# Supplementary material
Source: Springer Nature journal article supplement (https://www.springermedizin.de/resource/supplementary/12245_2010_1_MOESM2_ESM.pdf/9672578)

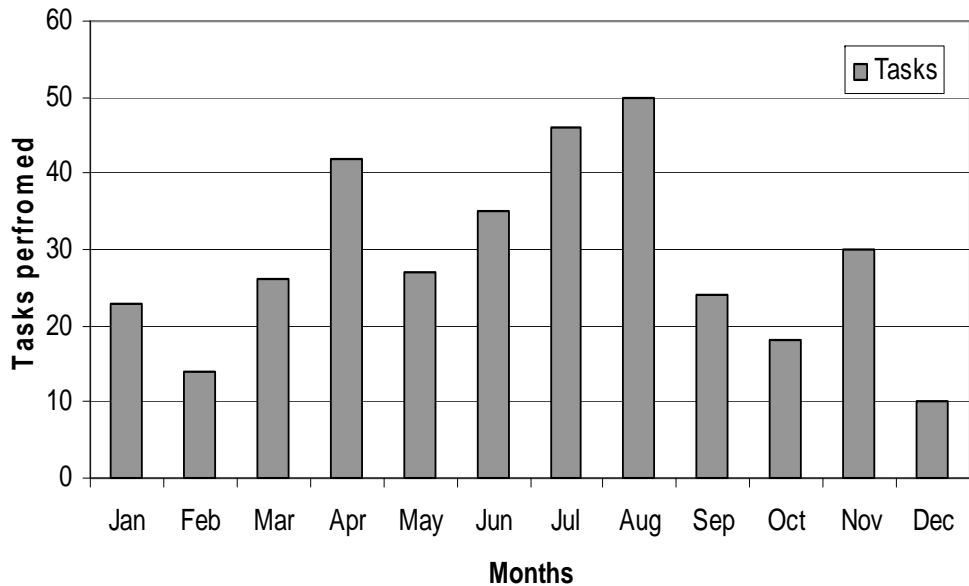

Supplement: MOESM2 [file 9672578]
